# Supplementary material for: Eighteen year weight trajectories and metabolic markers of diabetes in modernising China
Source: PubMed Central journal article supplement (PMC4119243; doi:10.1007/s00125-014-3284-y), 2014-06-03
Supplement: 125_2014_3284_MOESM1_ESM.pdf [file 125_2014_3284_MOESM1_ESM.pdf]

| <b>ESM Table 1. Missingness for the Analytic Sample</b> |                          |                                                                                                                                                                                     |                |
|---------------------------------------------------------|--------------------------|-------------------------------------------------------------------------------------------------------------------------------------------------------------------------------------|----------------|
|                                                         | <b>Included</b>          | <b>Excluded</b><br><b>(subjects with at least one</b><br><b>adult measurement less</b><br><b>than 66 in 2009 with no</b><br><b>trajectory or no fasting, or</b><br><b>pregnant)</b> | <b>p-value</b> |
|                                                         | <b>n=5436</b>            | <b>n=2713</b>                                                                                                                                                                       |                |
| 2009 Age                                                | 49.0 ( 40.8 -- 56.8 )    | 39.0 ( 27.0 -- 51.3 )                                                                                                                                                               | <0.0001        |
| Baseline Weight                                         | 56.4 ( 51.0 -- 63.5 )    | 58.9 ( 51.9 -- 66.0 )                                                                                                                                                               | <0.0001        |
| Mean Adult Height                                       | 160.9 ( 155.7 -- 167.0 ) | 162.2 ( 157.0 -- 169.0 )                                                                                                                                                            | <0.0001        |
| Total Household Income                                  | 32489 ( 17902 -- 55703 ) | 32190 ( 18911 -- 52632 )                                                                                                                                                            | 0.6756         |
| 2009 Urbanisation Index                                 | 61.0 ( 50.6 -- 83.0 )    | 74.7 ( 53.9 -- 89.1 )                                                                                                                                                               | <0.0001        |
| Ever Smoke                                              |                          |                                                                                                                                                                                     | 0.0033         |
| 0                                                       | 68.0% (3696)             | 43.7% (1185)                                                                                                                                                                        |                |
| 1                                                       | 31.9% (1736)             | 17.1% (463)                                                                                                                                                                         |                |
| Missing                                                 | 0.1% (4)                 | 39.3% (1065)                                                                                                                                                                        |                |
