# Supplementary material for: Eighteen year weight trajectories and metabolic markers of diabetes in modernising China
Source: PubMed Central journal article supplement (PMC4119243; doi:10.1007/s00125-014-3284-y), 2014-06-03
Supplement: 125_2014_3284_MOESM2_ESM.pdf [file 125_2014_3284_MOESM2_ESM.pdf]

**ESM Table 2. Summary of Results for Males Baseline Age 18 to 29 years**

| <b>Outcome</b>    | <b>Trajectory</b> | <b>Difference from Sex Specific Mean Baseline Weight</b> | <b>n</b> | <b>Interaction <i>p</i>-value</b> | <b>Overall <i>p</i>-value</b> | <b>Group Differences</b> |
|-------------------|-------------------|----------------------------------------------------------|----------|-----------------------------------|-------------------------------|--------------------------|
| Glucose           | 1                 | -7                                                       | 80       | 0.0201                            | 0.0005                        | 4                        |
|                   | 2                 | -7                                                       | 523      |                                   |                               | 3 4                      |
|                   | 3                 | -7                                                       | 248      |                                   |                               | 2                        |
|                   | 4                 | -7                                                       | 41       |                                   |                               | 1 2                      |
|                   | 1                 | 0                                                        | 80       |                                   |                               | 3 4                      |
|                   | 2                 | 0                                                        | 523      |                                   |                               | 3 4                      |
|                   | 3                 | 0                                                        | 248      |                                   |                               | 1 2 4                    |
|                   | 4                 | 0                                                        | 41       |                                   |                               | 1 2 3                    |
|                   | 1                 | 5                                                        | 80       |                                   |                               | 4                        |
|                   | 2                 | 5                                                        | 523      |                                   |                               |                          |
|                   | 3                 | 5                                                        | 248      |                                   |                               |                          |
|                   | 4                 | 5                                                        | 41       |                                   |                               | 1                        |
| HbA <sub>1c</sub> | 1                 | 0                                                        | 79       | 0.1153                            | 0.0046                        | 4                        |
|                   | 2                 | 0                                                        | 520      |                                   |                               | 3 4                      |
|                   | 3                 | 0                                                        | 247      |                                   |                               | 2 4                      |
|                   | 4                 | 0                                                        | 40       |                                   |                               | 1 2 3                    |
| Insulin           | 1                 | 0                                                        | 80       | 0.2016                            | <0.0001                       |                          |
|                   | 2                 | 0                                                        | 524      |                                   |                               | 3 4                      |
|                   | 3                 | 0                                                        | 248      |                                   |                               | 1 2                      |
|                   | 4                 | 0                                                        | 40       |                                   |                               | 1 2                      |
| log HOMA-IR       | 1                 | 0                                                        | 80       | 0.1953                            | <0.0001                       |                          |
|                   | 2                 | 0                                                        | 523      |                                   |                               | 1 3 4                    |
|                   | 3                 | 0                                                        | 248      |                                   |                               | 1 2                      |
|                   | 4                 | 0                                                        | 40       |                                   |                               | 1 2                      |
