# Supplementary material for: Eighteen year weight trajectories and metabolic markers of diabetes in modernising China
Source: PubMed Central journal article supplement (PMC4119243; doi:10.1007/s00125-014-3284-y), 2014-06-03
Supplement: 125_2014_3284_MOESM3_ESM.pdf [file 125_2014_3284_MOESM3_ESM.pdf]

**ESM Table 3. Summary of Results for Males Baseline Age 30 to 39 years**

| <b>Outcome</b>    | <b>Trajectory</b> | <b>Difference from Sex Specific Mean Baseline Weight</b> | <b>n</b> | <b>Interaction <math>p</math>-value</b> | <b>Overall <math>p</math>-value</b> | <b>Group Differences</b> |         |
|-------------------|-------------------|----------------------------------------------------------|----------|-----------------------------------------|-------------------------------------|--------------------------|---------|
| Glucose           | 1                 | 0                                                        | 44       | 0.421                                   | 0.3209                              |                          |         |
|                   | 3                 | 0                                                        | 300      |                                         |                                     |                          |         |
|                   | 2                 | 0                                                        | 352      |                                         |                                     |                          |         |
|                   | 4                 | 0                                                        | 120      |                                         |                                     |                          |         |
|                   | 5                 | 0                                                        | 16       |                                         |                                     |                          |         |
| HbA <sub>1c</sub> | 1                 | 0                                                        | 44       | 0.0666                                  | 0.3644                              |                          |         |
|                   | 3                 | 0                                                        | 298      |                                         |                                     |                          |         |
|                   | 2                 | 0                                                        | 343      |                                         |                                     |                          |         |
|                   | 4                 | 0                                                        | 120      |                                         |                                     |                          |         |
|                   | 5                 | 0                                                        | 16       |                                         |                                     |                          |         |
| Insulin           | 1                 | 0                                                        | 44       | 0.8282                                  | 0.7758                              |                          |         |
|                   | 3                 | 0                                                        | 298      |                                         |                                     |                          |         |
|                   | 2                 | 0                                                        | 351      |                                         |                                     |                          |         |
|                   | 4                 | 0                                                        | 119      |                                         |                                     |                          |         |
|                   | 5                 | 0                                                        | 16       |                                         |                                     |                          |         |
| log HOMA-IR       | 1                 | 0                                                        | 44       | 0.5303                                  | <0.0001                             |                          |         |
|                   | 3                 | 0                                                        | 298      |                                         |                                     |                          | 2 4 5   |
|                   | 2                 | 0                                                        | 350      |                                         |                                     |                          | 1 3 4 5 |
|                   | 4                 | 0                                                        | 119      |                                         |                                     |                          | 1 2 3   |
|                   | 5                 | 0                                                        | 16       |                                         |                                     |                          | 1 2 3   |
