# Supplementary material for: Eighteen year weight trajectories and metabolic markers of diabetes in modernising China
Source: PubMed Central journal article supplement (PMC4119243; doi:10.1007/s00125-014-3284-y), 2014-06-03
Supplement: 125_2014_3284_MOESM4_ESM.pdf [file 125_2014_3284_MOESM4_ESM.pdf]

**ESM Table 4. Summary of Results for Males Baseline Age 40 to 66y**

| <b>Outcome</b>    | <b>Trajectory</b> | <b>Difference from Sex Specific Mean Baseline Weight</b> | <b>n</b> | <b>Interaction <math>p</math>-value</b> | <b>Overall <math>p</math>-value</b> | <b>Group Differences</b> |
|-------------------|-------------------|----------------------------------------------------------|----------|-----------------------------------------|-------------------------------------|--------------------------|
| Glucose           | 1                 | -7                                                       | 27       | 0.0282                                  | 0.0477                              |                          |
|                   | 2                 | -7                                                       | 258      |                                         |                                     |                          |
|                   | 3                 | -7                                                       | 384      |                                         |                                     |                          |
|                   | 4                 | -7                                                       | 139      |                                         |                                     |                          |
|                   | 5                 | -7                                                       | 41       |                                         |                                     |                          |
|                   | 1                 | 0                                                        | 27       |                                         |                                     |                          |
|                   | 2                 | 0                                                        | 258      |                                         |                                     |                          |
|                   | 3                 | 0                                                        | 384      |                                         |                                     |                          |
|                   | 4                 | 0                                                        | 139      |                                         |                                     |                          |
|                   | 5                 | 0                                                        | 41       |                                         |                                     |                          |
|                   | 1                 | 5                                                        | 27       |                                         |                                     |                          |
|                   | 2                 | 5                                                        | 258      |                                         |                                     |                          |
|                   | 3                 | 5                                                        | 384      |                                         |                                     |                          |
|                   | 4                 | 5                                                        | 139      |                                         |                                     |                          |
|                   | 5                 | 5                                                        | 41       |                                         |                                     |                          |
| HbA <sub>1c</sub> | 1                 | 0                                                        | 27       | 0.0617                                  | 0.7882                              |                          |
|                   | 2                 | 0                                                        | 258      |                                         |                                     |                          |
|                   | 3                 | 0                                                        | 384      |                                         |                                     |                          |
|                   | 4                 | 0                                                        | 139      |                                         |                                     |                          |
|                   | 5                 | 0                                                        | 40       |                                         |                                     |                          |
| Insulin           | 1                 | 0                                                        | 27       | 0.8689                                  | 0.0132                              | 4 5                      |
|                   | 2                 | 0                                                        | 258      |                                         |                                     | 3 4 5                    |
|                   | 3                 | 0                                                        | 383      |                                         |                                     | 2                        |
|                   | 4                 | 0                                                        | 139      |                                         |                                     | 1 2                      |
|                   | 5                 | 0                                                        | 40       |                                         |                                     | 1 2                      |
| log HOMA-IR       | 1                 | 0                                                        | 27       | 0.4133                                  | <0.0001                             |                          |
|                   | 2                 | 0                                                        | 258      |                                         |                                     | 4 5                      |
|                   | 3                 | 0                                                        | 383      |                                         |                                     | 1 4 5                    |
|                   | 4                 | 0                                                        | 139      |                                         |                                     | 1 2 3                    |
|                   | 5                 | 0                                                        | 40       |                                         |                                     | 1 2 3                    |
