# Supplementary material for: Eighteen year weight trajectories and metabolic markers of diabetes in modernising China
Source: PubMed Central journal article supplement (PMC4119243; doi:10.1007/s00125-014-3284-y), 2014-06-03
Supplement: 125_2014_3284_MOESM5_ESM.pdf [file 125_2014_3284_MOESM5_ESM.pdf]

**ESM Table 5. Summary of Results for Females Baseline Age 18 to 29 years**

| <b>Outcome</b>    | <b>Trajectory</b> | <b>Difference from Sex Specific Mean Baseline Weight</b> | <b>n</b> | <b>Interaction <math>p</math>-value</b> | <b>Overall <math>p</math>-value</b> | <b>Group Differences</b> |
|-------------------|-------------------|----------------------------------------------------------|----------|-----------------------------------------|-------------------------------------|--------------------------|
| Glucose           | 1                 | 0                                                        | 81       | 0.6287                                  | 0.0162                              | 4                        |
|                   | 2                 | 0                                                        | 307      |                                         |                                     | 4                        |
|                   | 3                 | 0                                                        | 333      |                                         |                                     | 4                        |
|                   | 5                 | 0                                                        | 39       |                                         |                                     |                          |
|                   | 4                 | 0                                                        | 117      |                                         |                                     | 1 2 3                    |
|                   | 6                 | 0                                                        | 18       |                                         |                                     |                          |
| HbA <sub>1c</sub> | 1                 | 0                                                        | 81       | 0.5486                                  | 0.0247                              | 3 4                      |
|                   | 2                 | 0                                                        | 308      |                                         |                                     | 4                        |
|                   | 3                 | 0                                                        | 329      |                                         |                                     | 1 4                      |
|                   | 5                 | 0                                                        | 39       |                                         |                                     |                          |
|                   | 4                 | 0                                                        | 115      |                                         |                                     | 1 2 3                    |
|                   | 6                 | 0                                                        | 18       |                                         |                                     |                          |
| Insulin           | 1                 | 0                                                        | 81       | 0.4799                                  | 0.0999                              |                          |
|                   | 2                 | 0                                                        | 308      |                                         |                                     |                          |
|                   | 3                 | 0                                                        | 333      |                                         |                                     |                          |
|                   | 5                 | 0                                                        | 40       |                                         |                                     |                          |
|                   | 4                 | 0                                                        | 117      |                                         |                                     |                          |
|                   | 6                 | 0                                                        | 18       |                                         |                                     |                          |
| log HOMA-IR       | 1                 | 0                                                        | 81       | 0.2609                                  | <0.0001                             |                          |
|                   | 2                 | 0                                                        | 306      |                                         |                                     | 1 3 4 6                  |
|                   | 3                 | 0                                                        | 333      |                                         |                                     | 1 2                      |
|                   | 5                 | 0                                                        | 39       |                                         |                                     | 1                        |
|                   | 4                 | 0                                                        | 117      |                                         |                                     | 1 2                      |
|                   | 6                 | 0                                                        | 18       |                                         |                                     | 1 2                      |
