# Supplementary material for: Eighteen year weight trajectories and metabolic markers of diabetes in modernising China
Source: PubMed Central journal article supplement (PMC4119243; doi:10.1007/s00125-014-3284-y), 2014-06-03
Supplement: 125_2014_3284_MOESM6_ESM.pdf [file 125_2014_3284_MOESM6_ESM.pdf]

**ESM Table 6. Summary of Results for Females Baseline Age 30 to 39 years**

| <b>Outcome</b>    | <b>Trajectory</b> | <b>Difference from Sex Specific Mean Baseline Weight</b> | <b>n</b> | <b>Interaction <math>p</math>-value</b> | <b>Overall <math>p</math>-value</b> | <b>Group Differences</b> |         |
|-------------------|-------------------|----------------------------------------------------------|----------|-----------------------------------------|-------------------------------------|--------------------------|---------|
| Glucose           | 1                 | -5.5                                                     | 25       | 0.0053                                  | 0.0004                              |                          |         |
|                   | 2                 | -5.5                                                     | 148      |                                         |                                     |                          |         |
|                   | 3                 | -5.5                                                     | 509      |                                         |                                     |                          |         |
|                   | 4                 | -5.5                                                     | 308      |                                         |                                     |                          |         |
|                   | 6                 | -5.5                                                     | 40       |                                         |                                     |                          |         |
|                   | 5                 | -5.5                                                     | 21       |                                         |                                     |                          |         |
|                   | 1                 | 0                                                        | 25       |                                         |                                     |                          |         |
|                   | 2                 | 0                                                        | 148      |                                         |                                     |                          | 4       |
|                   | 3                 | 0                                                        | 509      |                                         |                                     |                          |         |
|                   | 4                 | 0                                                        | 308      |                                         |                                     |                          | 2       |
|                   | 6                 | 0                                                        | 40       |                                         |                                     |                          |         |
|                   | 5                 | 0                                                        | 21       |                                         |                                     |                          |         |
|                   | 1                 | 6                                                        | 25       |                                         |                                     |                          |         |
|                   | 2                 | 6                                                        | 148      |                                         |                                     |                          | 4 6     |
|                   | 3                 | 6                                                        | 509      |                                         |                                     |                          |         |
| 4                 | 6                 | 308                                                      |          | 2                                       |                                     |                          |         |
| 6                 | 6                 | 40                                                       |          | 2                                       |                                     |                          |         |
| 5                 | 6                 | 21                                                       |          |                                         |                                     |                          |         |
| HbA <sub>1c</sub> | 1                 | 0                                                        | 25       | 0.3547                                  | 0.1754                              |                          |         |
|                   | 2                 | 0                                                        | 148      |                                         |                                     |                          |         |
|                   | 3                 | 0                                                        | 509      |                                         |                                     |                          |         |
|                   | 4                 | 0                                                        | 307      |                                         |                                     |                          |         |
|                   | 6                 | 0                                                        | 40       |                                         |                                     |                          |         |
|                   | 5                 | 0                                                        | 21       |                                         |                                     |                          |         |
| Insulin           | 1                 | 0                                                        | 25       | 0.9999                                  | 0.4655                              |                          |         |
|                   | 2                 | 0                                                        | 149      |                                         |                                     |                          |         |
|                   | 3                 | 0                                                        | 510      |                                         |                                     |                          |         |
|                   | 4                 | 0                                                        | 308      |                                         |                                     |                          |         |
|                   | 6                 | 0                                                        | 40       |                                         |                                     |                          |         |
|                   | 5                 | 0                                                        | 21       |                                         |                                     |                          |         |
| log HOMA-IR       | 1                 | 0                                                        | 25       | 0.7696                                  | <0.0001                             |                          |         |
|                   | 2                 | 0                                                        | 148      |                                         |                                     |                          | 3 4 5 6 |
|                   | 3                 | 0                                                        | 508      |                                         |                                     |                          | 2 4 6   |
|                   | 4                 | 0                                                        | 308      |                                         |                                     |                          | 1 2 3 6 |
|                   | 6                 | 0                                                        | 40       |                                         |                                     |                          | 1 2 3 4 |
|                   | 5                 | 0                                                        | 21       |                                         |                                     |                          | 1 2     |
