# Supplementary material for: Eighteen year weight trajectories and metabolic markers of diabetes in modernising China
Source: PubMed Central journal article supplement (PMC4119243; doi:10.1007/s00125-014-3284-y), 2014-06-03
Supplement: 125_2014_3284_MOESM7_ESM.pdf [file 125_2014_3284_MOESM7_ESM.pdf]

**ESM Table 7. Summary of Results for Females Baseline age 40 to 66 years**

| Outcome     | Trajectory        | Difference from Sex Specific Mean Baseline Weight | n    | Interaction $p$ -value | Overall $p$ -value | Group Differences |        |        |  |
|-------------|-------------------|---------------------------------------------------|------|------------------------|--------------------|-------------------|--------|--------|--|
| Glucose     | 1                 | -5.5                                              | 41   | 0.0415                 | 0.0161             |                   |        |        |  |
|             | 2                 | -5.5                                              | 434  |                        |                    |                   |        |        |  |
|             | 3                 | -5.5                                              | 365  |                        |                    |                   |        |        |  |
|             | 4                 | -5.5                                              | 48   |                        |                    |                   |        |        |  |
|             | 1                 | 0                                                 | 41   |                        |                    |                   |        |        |  |
|             | 2                 | 0                                                 | 434  |                        |                    |                   |        |        |  |
|             | 3                 | 0                                                 | 365  |                        |                    |                   |        |        |  |
|             | 4                 | 0                                                 | 48   |                        |                    |                   |        |        |  |
|             | 1                 | 6                                                 | 41   |                        |                    |                   |        |        |  |
|             | 2                 | 6                                                 | 434  |                        |                    |                   | 4      |        |  |
|             | 3                 | 6                                                 | 365  |                        |                    |                   | 4      |        |  |
|             | 4                 | 6                                                 | 48   |                        |                    |                   | 2 3    |        |  |
|             | HbA <sub>1c</sub> | 1                                                 | -5.5 |                        |                    | 41                | 0.0027 | 0.0027 |  |
|             |                   | 2                                                 | -5.5 |                        |                    | 432               |        |        |  |
|             |                   | 3                                                 | -5.5 |                        |                    | 365               |        |        |  |
|             |                   | 4                                                 | -5.5 |                        |                    | 48                |        |        |  |
| 1           |                   | 0                                                 | 41   |                        |                    |                   |        |        |  |
| 2           |                   | 0                                                 | 432  |                        |                    |                   |        |        |  |
| 3           |                   | 0                                                 | 365  |                        |                    |                   |        |        |  |
| 4           |                   | 0                                                 | 48   |                        |                    |                   |        |        |  |
| 1           |                   | 6                                                 | 41   |                        |                    |                   |        |        |  |
| 2           |                   | 6                                                 | 432  |                        |                    |                   |        |        |  |
| 3           |                   | 6                                                 | 365  |                        |                    |                   |        |        |  |
| 4           |                   | 6                                                 | 48   |                        |                    |                   |        |        |  |
| Insulin     |                   | 1                                                 | 0    | 41                     | 0.7394             | 0.4397            |        |        |  |
|             |                   | 2                                                 | 0    | 433                    |                    |                   |        |        |  |
|             |                   | 3                                                 | 0    | 366                    |                    |                   |        |        |  |
|             |                   | 4                                                 | 0    | 48                     |                    |                   |        |        |  |
| log HOMA-IR | 1                 | 0                                                 | 41   | 0.2331                 | 0.0007             | 4                 |        |        |  |
|             | 2                 | 0                                                 | 433  |                        |                    | 4                 |        |        |  |
|             | 3                 | 0                                                 | 365  |                        |                    | 4                 |        |        |  |
|             | 4                 | 0                                                 | 48   |                        |                    | 1 2 3             |        |        |  |
